# Supplementary material for: Quantitative Genome-Wide Genetic Interaction Screens Reveal Global Epistatic Relationships of Protein Complexes in Escherichia coli
Source: PubMed Central journal article supplement (PMC3930520; doi:10.1371/journal.pgen.1004120), 2014-02-20
Supplement: pgen.1004120.s001.pdf [file pgen.1004120.s001.pdf]

A

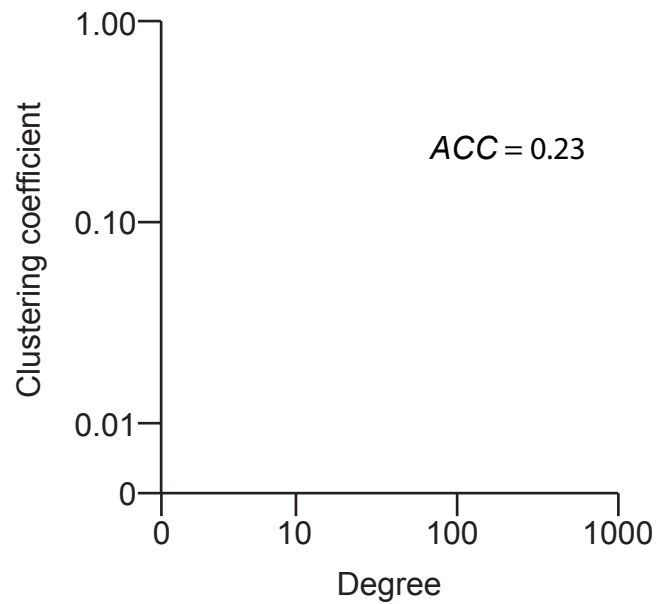

B

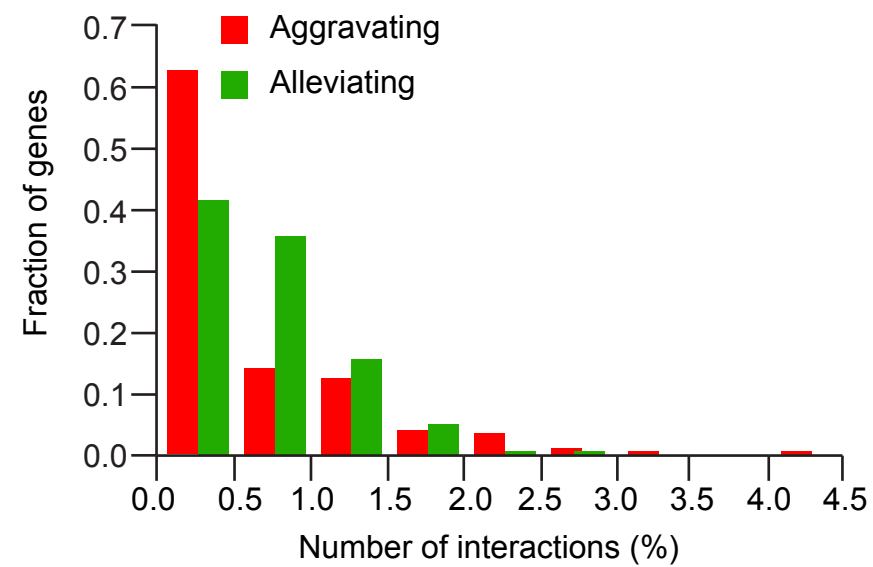

C

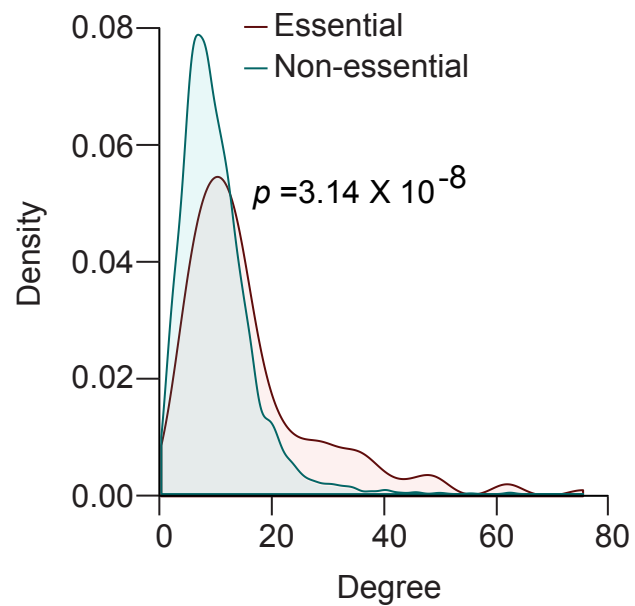

D

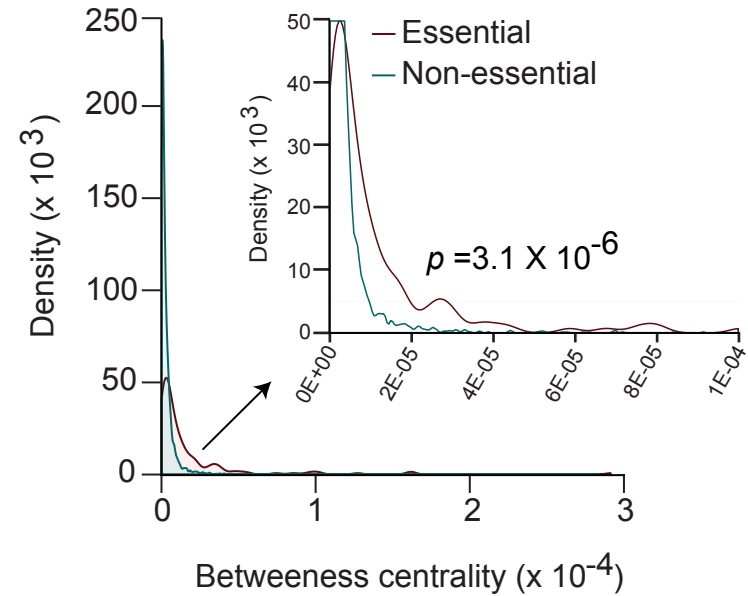

Figure S1
