# Supplementary material for: Quantitative Genome-Wide Genetic Interaction Screens Reveal Global Epistatic Relationships of Protein Complexes in Escherichia coli
Source: PubMed Central journal article supplement (PMC3930520; doi:10.1371/journal.pgen.1004120), 2014-02-20
Supplement: pgen.1004120.s005.pdf [file pgen.1004120.s005.pdf]

A

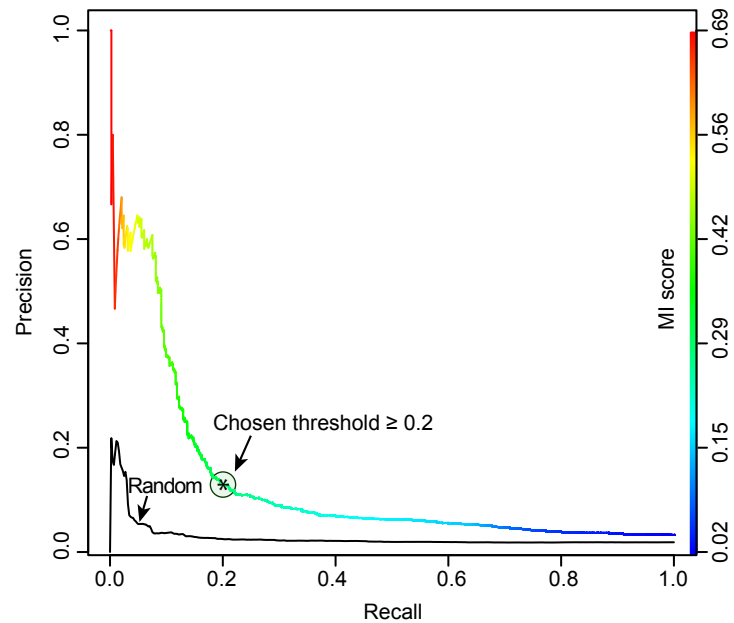

B

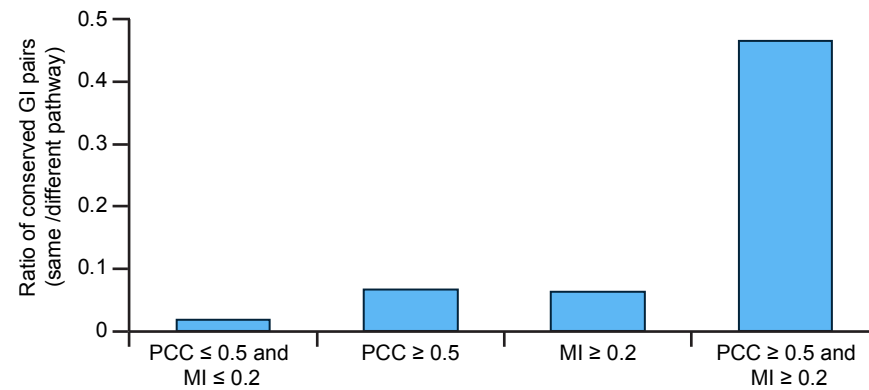

C

| Complexes                | Genes       | "Fep" enterobactin ABC transporter |             |             |
|--------------------------|-------------|------------------------------------|-------------|-------------|
|                          |             | <i>fepC</i>                        | <i>fepB</i> | <i>fepD</i> |
| Enterobactin synthetases | <i>entE</i> | 0.62                               | 0.49        | 0.51        |
|                          | <i>entB</i> | 0.58                               | 0.39        | 0.35        |

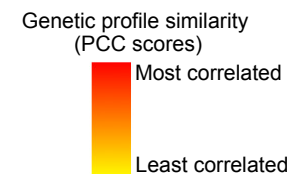

| Complexes       | Genes       | "Fep" enterobactin ABC transporter |             |             | Enterobactin synthetases |             |
|-----------------|-------------|------------------------------------|-------------|-------------|--------------------------|-------------|
|                 |             | <i>fepC</i>                        | <i>fepB</i> | <i>fepD</i> | <i>entE</i>              | <i>entB</i> |
| Sulfur transfer | <i>tusB</i> | 0.20                               | 0.17        | 0.19        | 0.16                     | 0.16        |
|                 | <i>tusC</i> | 0.33                               | 0.40        | 0.30        | 0.36                     | 0.30        |
|                 | <i>tusD</i> | 0.38                               | 0.45        | 0.39        | 0.45                     | 0.38        |

| Complexes              | Genes       | "Fep" enterobactin ABC transporter |             |             | Enterobactin synthetases |             |
|------------------------|-------------|------------------------------------|-------------|-------------|--------------------------|-------------|
|                        |             | <i>fepC</i>                        | <i>fepB</i> | <i>fepD</i> | <i>entE</i>              | <i>entB</i> |
| Thiamin biosynthesis I | <i>thiE</i> | 0.46                               | 0.33        | 0.30        | 0.34                     | 0.44        |
|                        | <i>thiC</i> | 0.20                               | 0.15        | 0.05        | 0.15                     | 0.23        |
|                        | <i>thiF</i> | 0.09                               | NA          | 0.06        | 0.15                     | 0.20        |
|                        | <i>thiM</i> | 0.07                               | 0.21        | 0.17        | 0.04                     | 0.05        |
|                        | <i>thiD</i> | 0.16                               | 0.35        | 0.13        | 0.04                     | 0.16        |

| Complexes                          | Genes       | "Fep" enterobactin ABC transporter |             |             | Enterobactin synthetases |             | Sulfur transfer |             |             |
|------------------------------------|-------------|------------------------------------|-------------|-------------|--------------------------|-------------|-----------------|-------------|-------------|
|                                    |             | <i>fepC</i>                        | <i>fepB</i> | <i>fepD</i> | <i>entE</i>              | <i>entB</i> | <i>tusB</i>     | <i>tusC</i> | <i>tusD</i> |
| Xanthine dehydrogenase             | <i>xdhA</i> | 0.30                               | 0.32        | 0.32        | 0.14                     | NA          | 0.53            | 0.50        | 0.52        |
|                                    | <i>xdhB</i> | NA                                 | 0.03        | NA          | 0.33                     | 0.23        | 0.19            | 0.27        | 0.23        |
|                                    | <i>xdhC</i> | 0.18                               | 0.16        | 0.13        | 0.21                     | 0.14        | 0.27            | 0.16        | 0.32        |
| Glycerol-3-phosphate-dehydrogenase | <i>glpA</i> | 0.39                               | 0.44        | 0.37        | 0.38                     | 0.29        | 0.11            | 0.38        | 0.38        |
|                                    | <i>glpB</i> | 0.48                               | 0.38        | 0.40        | 0.35                     | 0.47        | 0.05            | 0.26        | 0.31        |
|                                    | <i>glpC</i> | NA                                 | 0.02        | NA          | NA                       | NA          | 0.02            | NA          | NA          |

Figure S5
