# Supplementary material for: Quantitative Genome-Wide Genetic Interaction Screens Reveal Global Epistatic Relationships of Protein Complexes in Escherichia coli
Source: PubMed Central journal article supplement (PMC3930520; doi:10.1371/journal.pgen.1004120), 2014-02-20
Supplement: pgen.1004120.s013.pdf [file pgen.1004120.s013.pdf]

**Protocol S8. Effect of Isc pathway overexpression and aminoglycoside treatment on *E. coli* growth**

*E. coli* cells were grown in LB (10 g/L Bacto-tryptone, 5 g/L Yeast extract, and 10 g/L NaCl) at 37 °C with vigorous shaking. For plasmid maintenance, 2.5 µg/mL of tetracycline was added. To generate mild oxidative stress, 3 µg/mL (final concentration) of kanamycin was included in the media essentially as previously described [1]. Growth of the cells was followed by reading OD<sub>600</sub> at regular time intervals using a SpectraMax M2 Fluorescence Plate Reader. Data represent the average from three independent biological repeats.

**References:**

1. Kohanski MA, Dwyer DJ, Hayete B, A. LC, Collins JJ (2007) A Common Mechanism of Cellular Death Induced by Bactericidal Antibiotics. *Cell* 130: 797-810.
