# Supplementary material for: Quantitative Genome-Wide Genetic Interaction Screens Reveal Global Epistatic Relationships of Protein Complexes in Escherichia coli
Source: PubMed Central journal article supplement (PMC3930520; doi:10.1371/journal.pgen.1004120), 2014-02-20
Supplement: pgen.1004120.s014.pdf [file pgen.1004120.s014.pdf]

**Protocol S9. Effect of *E. coli* growth inhibition of RavA overexpression on inorganic and organic sources of sulphur**

*E. coli* MG1655 wild-type transformed with the plasmid p11 (empty vector control) and pRavA (p11-*ravA*) were grown overnight in LB supplemented with 100 µg/mL ampicillin to prepare the required pre-cultures. On the following day, cells were harvested by centrifugation and were re-suspended in sterilized W-salts media (100 mM potassium phosphate, pH 7.5, 2.1 mM MgSO<sub>4</sub>, 0.66 µM thiamine, 22 µM glucose, 19 µM NH<sub>4</sub>Cl), followed by OD<sub>600</sub> measurements to assess cell count per unit volume. The re-suspended cells were then added to W-salts media in which sulphur was supplied via 2.1 mM MgSO<sub>4</sub>, 2.1 mM MgS<sub>2</sub>O<sub>3</sub>, 0.42 mM taurine, 0.42 mM 2-(4-pyridyl)-ethanesulfonate (PESF) or 0.42 mM cystine (Cys-S-S-Cys). The cell density in all cultures was adjusted to a starting OD<sub>600</sub> ~0.05. A total of three cultures were prepared for each *E. coli* strain from three independent pre-cultures. Cells were grown at 37 °C, and their growth was monitored by taking OD<sub>600</sub> measurements at the required time points over 24 hours.
