# Supplementary material for: Quantitative Genome-Wide Genetic Interaction Screens Reveal Global Epistatic Relationships of Protein Complexes in Escherichia coli
Source: PubMed Central journal article supplement (PMC3930520; doi:10.1371/journal.pgen.1004120), 2014-02-20
Supplement: pgen.1004120.s015.pdf [file pgen.1004120.s015.pdf]

### **Protocol S10. Immunoprecipitation**

The sequential peptide affinity (SPA)-tagged fusion strains with kanamycin selectable marker cassette is endogenously tagged in DY330 by targeted homologous recombination essentially as previously described [1]. Briefly, the sonicated cell lysates from the SPA-tag expressed strains grown at an  $OD_{600} \sim 0.6$  were incubated for 3 hr at 4°C with anti-Flag M2 agarose beads, which recognizes the FLAG epitope of the SPA-tag. The immunoprecipitated proteins were separated on a 10% SDS polyacrylamide gel and transferred onto nitrocellulose membranes essentially as previously described [1]. The membranes were subsequently probed using the anti-RavA and anti-ViaA polyclonal antibodies generated in rabbits from the University of Toronto, Faculty of Medicine, Division of Comparative Medicine. Antibodies from the sera was purified using CNBr (cyanogen bromide)-activated sepharose beads cross-linked with the respective purified proteins. The membrane probed with the antibodies is visualized by chemiluminescence (Pierce).

### **References:**

1. Babu M, Butland G, Pogoutse O, Li J, Greenblatt JF, et al. (2009) Sequential peptide affinity purification system for the systematic isolation and identification of protein complexes from *Escherichia coli*. *Methods Mol Biol* 564: 373-400.
